# Supplementary material
Source: PubMed Central journal article supplement (PMC3899144)
Supplement: hvi-9-1084-s01.pdf [file hvi-9-1084-s01.pdf]

## **Supplemental Material to:**

**Jingyi Yang, Maohua Zhong, Yan Zhang, Ejuan Zhang, Ying Sun, Yuan Cao, Yaoming Li, Dihan Zhou, Benxia He, Yaoqing Chen, Yi Yang, Jie Yu and Huimin Yan**

**Antigen replacement of domains  
D2 and D3 in flagellin promotes mucosal  
IgA production and attenuates flagellin-induced  
inflammatory response after intranasal immunization**

**2013; 9(5)**

**<http://dx.doi.org/10.4161/hv.23809>**

**[www.landesbioscience.com/journals/vaccines/article/23809](http://www.landesbioscience.com/journals/vaccines/article/23809)**

**Antigen replacement of domains D2 and D3 in flagellin promotes  
mucosal IgA production and attenuates flagellin-induced  
inflammatory response after intranasal immunization**

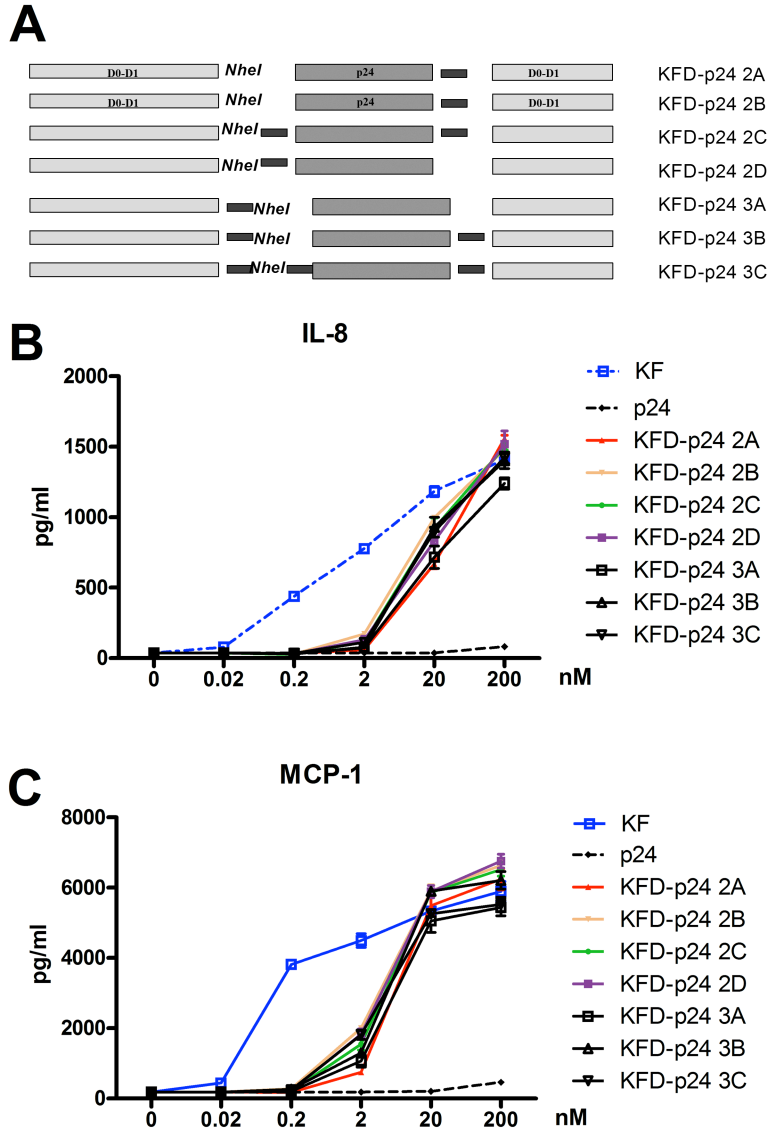

**Figure S1.** Flagellins with replaced D2 and D3 domains show similar TLR5 agonist efficacy. (A) Schematic diagram showing domain structures and variants. KFD-p24 2A / 2B / 2C / 2D / 3A / 3B / 3C. (B) IL-8 and (C) MCP-1 in the cell culture supernatants of Caco-2 cells 6-h post KFD-p24

stimulation were tested by ELISA. Data are presented as the means  $\pm$  SEM from triplicates of one experiment that was repeated three times.

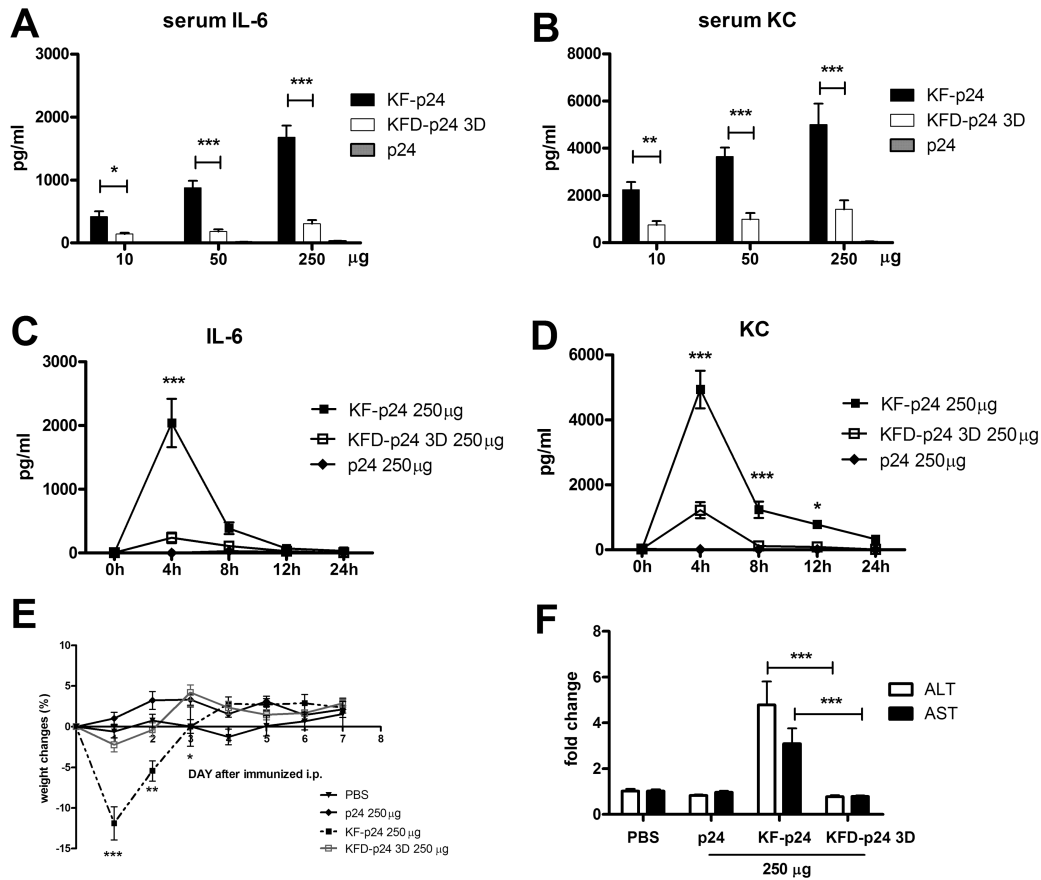

**Figure S2.** KFD-p24 3D induced less of a systemic inflammatory response after intra-peritoneal administration than did KF-p24. C57BL/6 mice were injected intraperitoneally with p24, KFD-p24 3D or KF-p24 in 250 $\mu$ l PBS. (A) and (B) IL-6 and KC in serum were tested by ELISA 4h after 10  $\mu$ g, 50  $\mu$ g or 250  $\mu$ g of stimulus administration. (C) and (D) Time-course of IL-6 and KC in serum were tested by ELISA after administration. (E) Time-course of body mass changes after administration. (F) Compared with the control group (250  $\mu$ g p24) the fold changes of serum transaminase level were evaluated 24 h post-administration i.p. Data are presented as the means  $\pm$  SEM from one experiment that was repeated three times (n=6 per group).

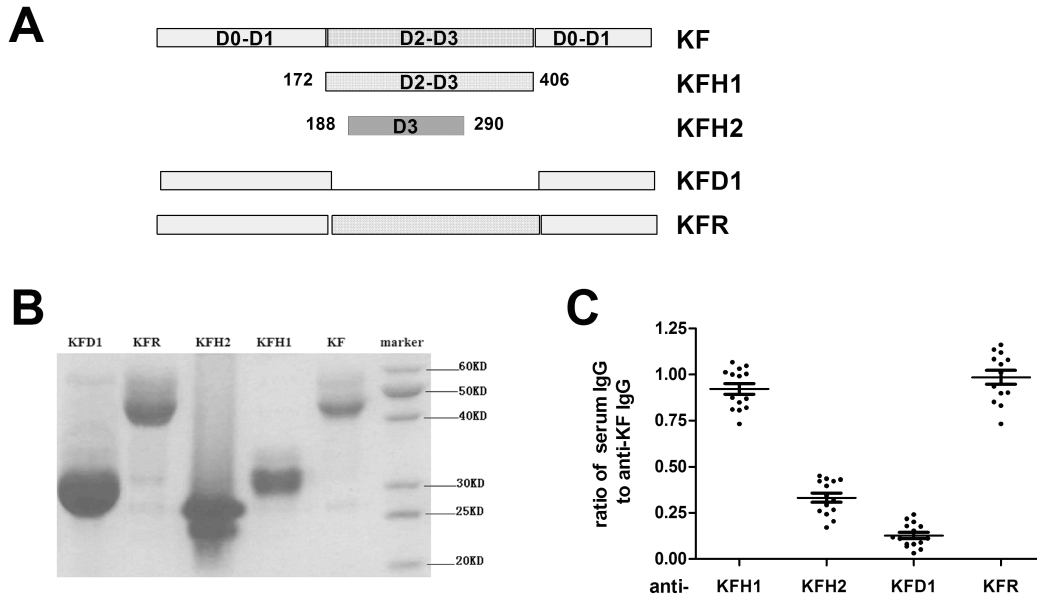

**Figure S3.** Domains D2 and D3 constitute the main antigenicity region of KF. A series of KF-derived flagellin was generated and coated to test the IgG titers of serum from BALB/c mice pre-immunized intranasally at 0, 4<sup>th</sup>, or 8<sup>th</sup> weeks with 5  $\mu$ g KF plus 5  $\mu$ g OVA or 5 $\mu$ g KF alone. (A) and (B) Schematic diagram and SDS-PAGE of a different KF variant. KFR: domain D2 and D3 of KF re-inserted into KFD1. (B) SDS-PAGE of a different KF variant. (C) Ratios of different KF variant-specific serum IgG titer to KF specific IgG titer. Data are presented as the means  $\pm$  SEM of one experiment that was repeated three times.
